# Supplementary material
Source: HighWire-hosted journal article supplement (https://jech.bmj.com/content/77/11/704)
Supplement: inline-supplementary-material-2 [file inline-supplementary-material-2.pdf]

Table 2. Quality Assessment (AMSTAR)

|                               | 1. Was an 'a priori' design provided? | 2. Was there duplicate study selection and data extraction? | 3. Was a comprehensive literature search performed? | 4. Was the status of publication (i.e. grey literature) used as an inclusion criterion? | 5. Was a list of studies (included and excluded) provided? | 6. Were the characteristics of the included studies provided? | 7. Was the scientific quality of the included studies assessed and documented? | 8. Was the scientific quality of the included studies used appropriately in formulating conclusions? | 9. Were the methods used to combine the findings of studies appropriate? | 10. Was the likelihood of publication bias assessed? | 11. Was the conflict of interest stated? | TOTAL SCORE | QUALITY |
|-------------------------------|---------------------------------------|-------------------------------------------------------------|-----------------------------------------------------|-----------------------------------------------------------------------------------------|------------------------------------------------------------|---------------------------------------------------------------|--------------------------------------------------------------------------------|------------------------------------------------------------------------------------------------------|--------------------------------------------------------------------------|------------------------------------------------------|------------------------------------------|-------------|---------|
| Bussi eres et al., 2021       | Y                                     | Y                                                           | Y                                                   | N                                                                                       | N                                                          | Y                                                             | N                                                                              | N                                                                                                    | Y                                                                        | Y                                                    | Y                                        | 7           | MED     |
| Chaabane 2021                 | Y                                     | Y                                                           | Y                                                   | N                                                                                       | N                                                          | Y                                                             | Y                                                                              | N                                                                                                    | N                                                                        | N                                                    | Y                                        | 6           | MED     |
| Chai et al., 2021             | Y                                     | N                                                           | Y                                                   | N                                                                                       | N                                                          | Y                                                             | Y                                                                              | N                                                                                                    | Y                                                                        | Y                                                    | Y                                        | 7           | MED     |
| Chawla et al., 2021           | Y                                     | Y                                                           | Y                                                   | N                                                                                       | N                                                          | Y                                                             | Y                                                                              | N                                                                                                    | N                                                                        | N                                                    | Y                                        | 6           | MED     |
| Cunning et al., 2021          | Y                                     | N                                                           | Y                                                   | N                                                                                       | N                                                          | Y                                                             | Y                                                                              | Y                                                                                                    | N                                                                        | N                                                    | Y                                        | 6           | MED     |
| de Moura Gabriel et al., 2022 | Y                                     | Y                                                           | N                                                   | N                                                                                       | N                                                          | Y                                                             | Y                                                                              | N                                                                                                    | N                                                                        | Y                                                    | Y                                        | 6           | MED     |
| Djurdjevic et al., 2022       | Y                                     | Y                                                           | Y                                                   | N                                                                                       | N                                                          | Y                                                             | Y                                                                              | Y                                                                                                    | Y                                                                        | N                                                    | N                                        | 5           | MED     |
| Gul & Demirci, 2022           | Y                                     | Y                                                           | N                                                   | N                                                                                       | N                                                          | Y                                                             | N                                                                              | N                                                                                                    | Y                                                                        | N                                                    | Y                                        | 5           | MED     |
| Imran et al. 2020             | Y                                     | Y                                                           | Y                                                   | Y                                                                                       | N                                                          | Y                                                             | N                                                                              | N                                                                                                    | N                                                                        | N                                                    | Y                                        | 6           | MED     |
| Jones et al., 2021            | Y                                     | Y                                                           | Y                                                   | Y                                                                                       | N                                                          | N                                                             | Y                                                                              | N                                                                                                    | N                                                                        | N                                                    | Y                                        | 6           | MED     |
| Layman et al., 2022           | Y                                     | Y                                                           | Y                                                   | N                                                                                       | N                                                          | Y                                                             | N                                                                              | N                                                                                                    | Y                                                                        | N                                                    | Y                                        | 6           | MED     |
| Ma et al., 2021               | Y                                     | Y                                                           | Y                                                   | Y                                                                                       | N                                                          | Y                                                             | N                                                                              | N                                                                                                    | Y                                                                        | Y                                                    | Y                                        | 8           | HIGH    |
| Meherali et al., 2021         | Y                                     | Y                                                           | Y                                                   | N                                                                                       | N                                                          | Y                                                             | Y                                                                              | Y                                                                                                    | Y                                                                        | N                                                    | Y                                        | 8           | HIGH    |
| Nearchou et al., 2020         | Y                                     | Y                                                           | Y                                                   | N                                                                                       | N                                                          | Y                                                             | Y                                                                              | Y                                                                                                    | Y                                                                        | N                                                    | Y                                        | 8           | HIGH    |
| Nobari et al., 2021           | Y                                     | Y                                                           | Y                                                   | N                                                                                       | N                                                          | Y                                                             | N                                                                              | N                                                                                                    | Y                                                                        | N                                                    | Y                                        | 6           | MED     |
| Oliveira et al., 2022         | Y                                     | Y                                                           | Y                                                   | Y                                                                                       | N                                                          | Y                                                             | Y                                                                              | Y                                                                                                    | Y                                                                        | Y                                                    | Y                                        | 10          | HIGH    |
| Panchal et al., 2021          | Y                                     | Y                                                           | Y                                                   | Y                                                                                       | N                                                          | Y                                                             | Y                                                                              | Y                                                                                                    | Y                                                                        | N                                                    | Y                                        | 8           | HIGH    |
| Panda et al. 2020             | Y                                     | Y                                                           | Y                                                   | N                                                                                       | N                                                          | Y                                                             | Y                                                                              | Y                                                                                                    | Y                                                                        | Y                                                    | N                                        | 8           | HIGH    |
| Racine et al., 2021           | Y                                     | Y                                                           | Y                                                   | Y                                                                                       | N                                                          | Y                                                             | Y                                                                              | Y                                                                                                    | Y                                                                        | Y                                                    | Y                                        | 10          | HIGH    |
| Samji et al., 2021            | Y                                     | N                                                           | N                                                   | N                                                                                       | N                                                          | N                                                             | Y                                                                              | Y                                                                                                    | Y                                                                        | N                                                    | Y                                        | 5           | MED     |
| Sharma et al., 2021           | Y                                     | Y                                                           | Y                                                   | N                                                                                       | N                                                          | Y                                                             | Y                                                                              | Y                                                                                                    | Y                                                                        | Y                                                    | Y                                        | 9           | HIGH    |
| Theberath et al., 2022        | Y                                     | Y                                                           | Y                                                   | N                                                                                       | N                                                          | Y                                                             | Y                                                                              | Y                                                                                                    | Y                                                                        | N                                                    | Y                                        | 8           | HIGH    |
| Viner et al., 2022            | Y                                     | Y                                                           | Y                                                   | Y                                                                                       | N                                                          | Y                                                             | Y                                                                              | Y                                                                                                    | Y                                                                        | N                                                    | Y                                        | 6           | MED     |
| Windarwati et al., 2022       | Y                                     | Y                                                           | Y                                                   | N                                                                                       | N                                                          | Y                                                             | N                                                                              | N                                                                                                    | N                                                                        | N                                                    | Y                                        | 4           | MED     |
